# Supplementary material for: LRRK2 Knockout Confers Resistance in HEK-293 Cells to Rotenone-Induced Oxidative Stress, Mitochondrial Damage, and Apoptosis
Source: MDPI journal article supplement (doi:10.3390/ijms241310474), 2023-06-22
Supplement: s1 [file s1]

## Supplementary Material

**Supplementary Fig S1(A). LRRK2 gene editing by CRISPR/Cas9 method in HEK-293 cells.** Figure shows three sgRNAs targeting the start codon (ATG) exon 1 of LRRK2 (e.g., 1. Fw sgRNA (gL1), 2. Rv sgRNA (gL2), and 3. Rv sgRNA (gL3), *green* color), with their respective protospacer adjacent motif (PAM, *red* color), and Cas9 cleavage site (*blue* arrowheads) designed using CRISPOR software. **(B). PCR amplicons.** Figure shows PCR amplicons from WT and edited LRRK2 fragments obtained by LRRK2-specific primers (Suppl. Table S1).

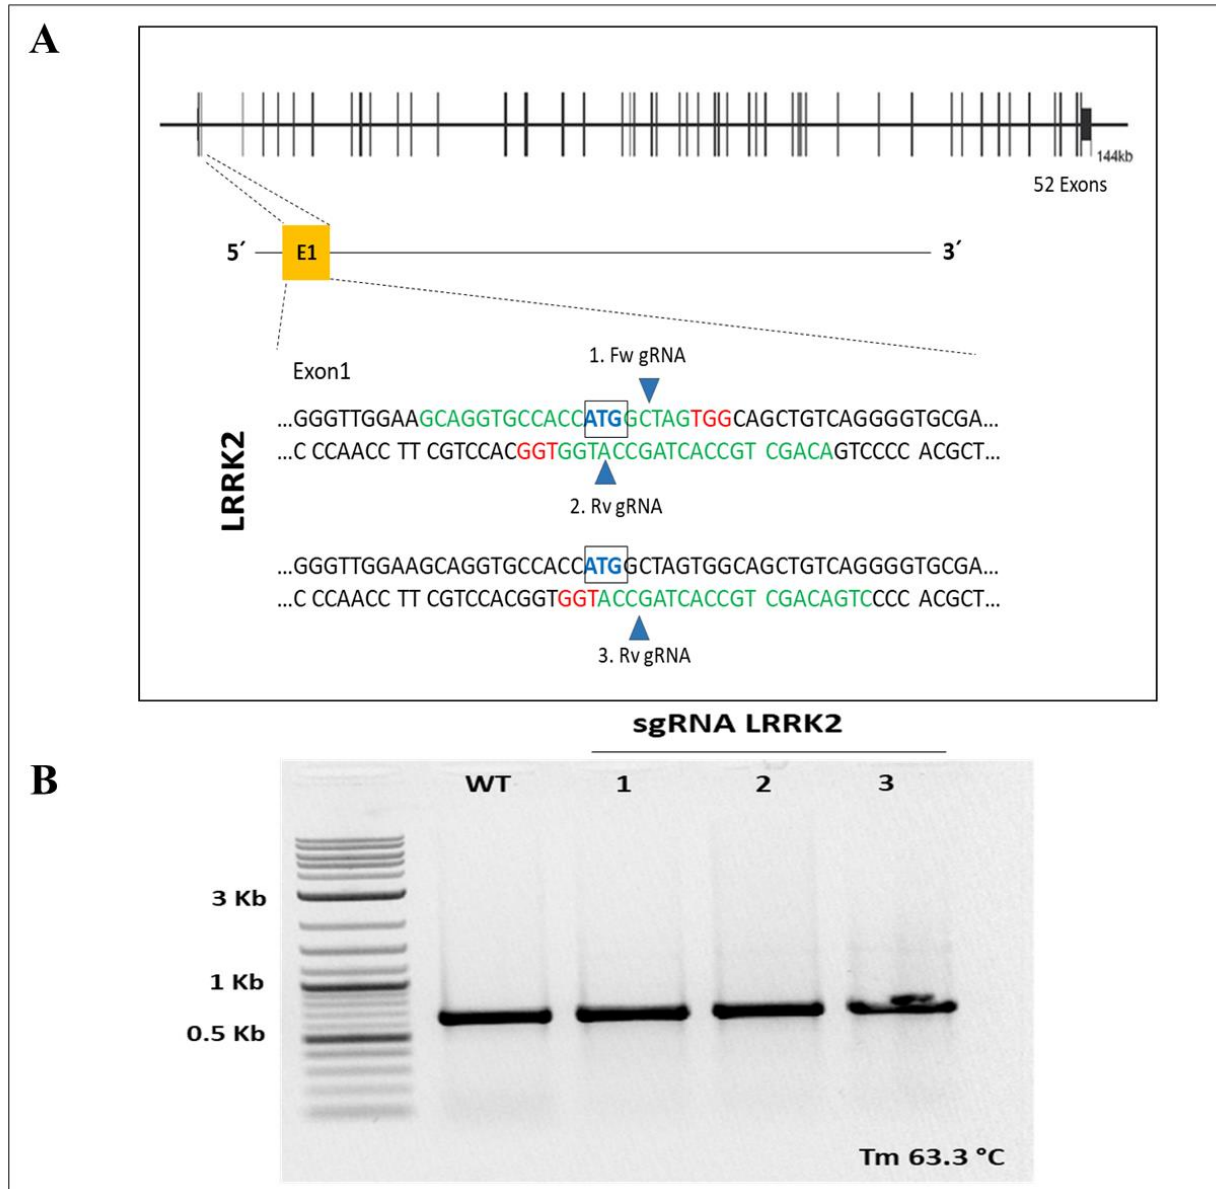

**Supplementary Figure S2. Knockout confirmation of LRRK2 using Synthego's Inference of CRISPR Edits (ICE) tool and Flow cytometry.** HEK293 cells treated with CRISPR Cas9-RNP containing guides for LRRK2 (gL1, gL2, gL3) to generate knockout (KO) cell lines. **(A-C)** Sanger sequence showing edited and wild-type (control HEK-293 WT LRRK2) sequences in the region around the gRNA LRRK2 gL1, gL2, and gL3 guide sequences. Sequence base calls from both the control (HEK-293 WT LRRK2) and edited.ab1 files, which contained mixed base calls, were illustrated. The horizontal, black, underlined region represents the guide sequence. The horizontal, red, underline is the PAM site. The vertical black dotted line represents the actual cut site. Cutting and error-prone repair usually result in mixed sequencing bases after the cut in the gL2 and gL3 target regions. **(D-F)** The discordance plot details the level of alignment per base between the HEK293 LRRK2 WT (control) and the edited HEK293 LRRK2 KO in the inference window (the region around the cut site). The average amount of signal that disagrees with the reference sequence derived from the control trace file is shown. On the plot, the green line and the orange line should be close together before the cut site, with a typical CRISPR edit resulting in a jump in the discordance near the cut site and continuing to remain far apart after the cut site (representing a high level of sequence discordance). **(G-I)** Indel plot displays the inferred distribution of indels in the HEK293 edited population at gL2 and gL3 target sites. Each bar of the Indel plot shows the size of the insertion or deletion (+ or - 1 or more nucleotides), along with the percentage of genomes that contain it. **(J-L)** Flow cytometry analysis of LRRK2 expression in HEK293 edited L1, L2 and L3 clones (in *red*) in comparison with control (HEK-293 WT in *blue*).

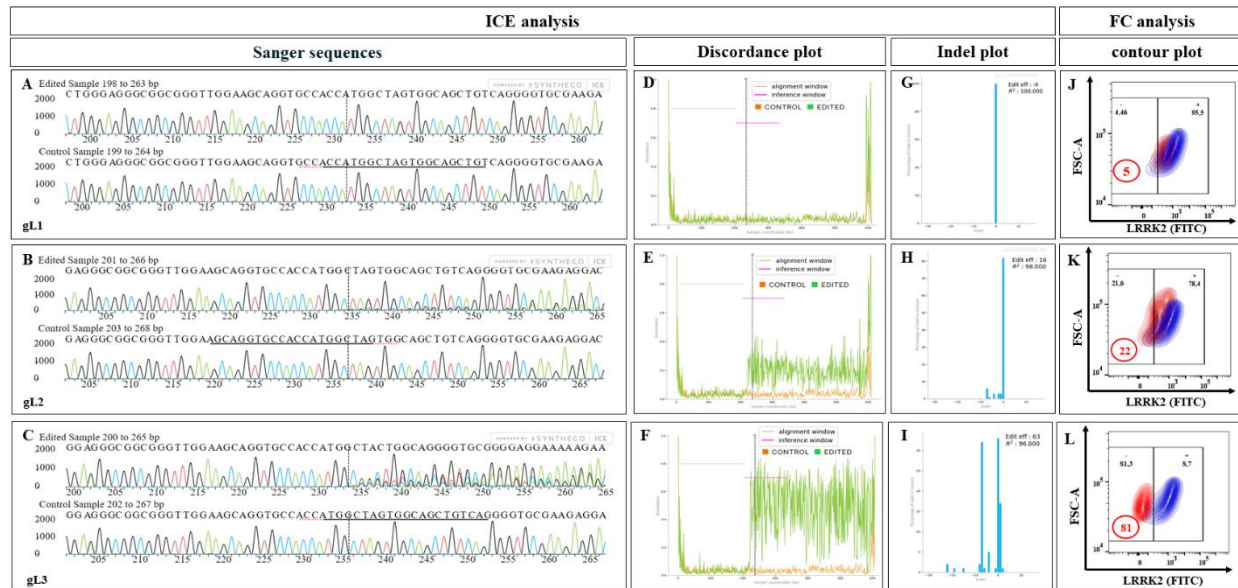

**Supplementary Table S1. Table from ICE analysis displaying ICE and KO scores as well as sgRNA sequences towards LRRK2.**

Knockout (KO) clones were sequenced by Sanger sequencing using primer LRRK2 seq to obtain knock-out efficiencies with the synthego ICE (Inference of CRISPR Edits) tool. Three crRNAs were designed for the LRRK2 locus at exon 1 in HEK-293 cells. The  $R^2$  value (Pearson correlation coefficient) is a measure of how well the proposed indel distribution fits the Sanger sequence data of the edited sample. The maximum  $R^2$  value is 1.0 and the sum of all individual contributions will be equal to the  $R^2$  value. The  $R^2$  value is critical for assessing the indel% and KO Score, as it sets the maximum value for these metrics. The higher the  $R^2$  value, the higher the confidence in the indel percentage and KO score. So, an  $R^2$  value of 0.8 or more indicates a robust analysis, but  $R^2$  values below 0.8 should be considered with caution. All analyses obtained values over 0.8 knockout (KO) score is the proportion of sequences that are likely to result in functional protein knockout (frameshift mutations or indels of 21+ bp). The higher the KO score, the higher the percentage of sequences that result in a knockout of the target gene. The crRNA L3 showed the best efficiency (in **bold**).

| Label       | ICE | KO-Score  | ICE d | R Squared | Mean Discord Before | Mean Discord After | Guide Sequences      | LRRK2 seq Forward/Reverse primer (5'-3')     |
|-------------|-----|-----------|-------|-----------|---------------------|--------------------|----------------------|----------------------------------------------|
| g L1        | 0   | 0         | 1     | 1         | 0,03220563          | 0,056255118        | ACAGCTGCCACTAGCCATGG | ATAAACAGGCGGGCGTGGG/<br>TGGGCTCCTTAAGAGTCCGG |
| g L2        | 16  | 15        | 26    | 0,98      | 0,032967001         | 0,208505456        | GCAGGTGCCACCATGGCTAG |                                              |
| <b>g L3</b> | 63  | <b>61</b> | 69    | 0,96      | 0,031821972         | 0,493719012        | CTGACAGCTGCCACTAGCCA |                                              |

**Supplementary Table S2. Data of Normality and Variance Homogeneity tests.**

| Technique      | Marker            | Experimental group | Normality         |                            |           | Variance homogeneity |                            |           |
|----------------|-------------------|--------------------|-------------------|----------------------------|-----------|----------------------|----------------------------|-----------|
|                |                   |                    | Shapiro-Wilk test |                            |           | Levene test          |                            |           |
|                |                   |                    | P value           | Passed yes/no (alpha=0.05) | P summary | P value              | Passed yes/no (alpha=0.05) | P summary |
| Flow cytometry | Mitotracker       | WT ROT 0           | 0.000             | No                         | *         | 0.228                | Yes                        | ns        |
|                |                   | WT ROT 1           | 0.637             | Yes                        | ns        |                      |                            |           |
|                |                   | WT ROT 5           | 0.637             | Yes                        | ns        |                      |                            |           |
|                |                   | WT ROT 10          | 0.780             | Yes                        | ns        |                      |                            |           |
|                |                   | WT ROT 50          | 0.780             | Yes                        | ns        |                      |                            |           |
|                |                   | KO ROT 0           | >0.999            | Yes                        | ns        |                      |                            |           |
|                |                   | KO ROT 1           | 0.637             | Yes                        | ns        |                      |                            |           |
|                |                   | KO ROT 5           | 0.637             | Yes                        | ns        |                      |                            |           |
|                |                   | KO ROT 10          | 0.637             | Yes                        | ns        |                      |                            |           |
|                |                   | KO ROT 50          | 0.726             | Yes                        | ns        |                      |                            |           |
|                | DCF               | WT ROT 0           | >0.999            | Yes                        | ns        | 0.358                | Yes                        | ns        |
|                |                   | WT ROT 1           | 0.637             | Yes                        | ns        |                      |                            |           |
|                |                   | WT ROT 5           | 0.637             | Yes                        | ns        |                      |                            |           |
|                |                   | WT ROT 10          | >0.999            | Yes                        | ns        |                      |                            |           |
|                |                   | WT ROT 50          | 0.843             | Yes                        | ns        |                      |                            |           |
|                |                   | KO ROT 0           | 0.637             | Yes                        | ns        |                      |                            |           |
|                |                   | KO ROT 1           | 0.637             | Yes                        | ns        |                      |                            |           |
|                |                   | KO ROT 5           | >0.999            | Yes                        | ns        |                      |                            |           |
|                |                   | KO ROT 10          | 0.637             | Yes                        | ns        |                      |                            |           |
|                |                   | KO ROT 50          | 0.637             | Yes                        | ns        |                      |                            |           |
|                | DNA fragmentation | WT ROT 0           | 0.637             | Yes                        | ns        | 0.846                | Yes                        | ns        |
|                |                   | WT ROT 1           | >0.999            | Yes                        | ns        |                      |                            |           |
|                |                   | WT ROT 5           | 0.637             | Yes                        | ns        |                      |                            |           |
|                |                   | WT ROT 10          | 0.637             | Yes                        | ns        |                      |                            |           |
|                |                   | WT ROT 50          | 0.637             | Yes                        | ns        |                      |                            |           |
|                |                   | KO ROT 0           | >0.999            | Yes                        | ns        |                      |                            |           |
|                |                   | KO ROT 1           | 0.637             | Yes                        | ns        |                      |                            |           |
|                |                   | KO ROT 5           | >0.999            | Yes                        | ns        |                      |                            |           |
|                |                   | KO ROT 10          | 0.637             | Yes                        | ns        |                      |                            |           |
|                |                   | KO ROT 50          | 0.463             | Yes                        | ns        |                      |                            |           |
|                | Total-LRRK2       | WT                 | 0.726             | Yes                        | ns        | >0.999               | Yes                        | ns        |
|                |                   | KO                 | 0.6369            | Yes                        | ns        |                      |                            |           |

|    |             |        |         |     |    |       |     |    |
|----|-------------|--------|---------|-----|----|-------|-----|----|
|    | ox-DJ1      | WT UNT | 0.982   | Yes | ns | 0.242 | Yes | ns |
|    |             | WT ROT | 0.788   | Yes | ns |       |     |    |
|    |             | KO UNT | 0.726   | Yes | ns |       |     |    |
|    |             | KO ROT | 0.759   | Yes | ns |       |     |    |
|    | pS935-LRRK2 | WT UNT | 0.708   | Yes | ns | 0.269 | Yes | ns |
|    |             | WT ROT | 0.575   | Yes | ns |       |     |    |
|    |             | KO UNT | 0.742   | Yes | ns |       |     |    |
|    |             | KO ROT | 0.700   | Yes | ns |       |     |    |
|    | pS65-cJun   | WT UNT | 0.823   | Yes | ns | 0.236 | Yes | ns |
|    |             | WT ROT | 0.201   | Yes | ns |       |     |    |
|    |             | KO UNT | 0.515   | Yes | ns |       |     |    |
|    |             | KO ROT | 0.228   | Yes | ns |       |     |    |
|    | p53         | WT UNT | 0.614   | Yes | ns | 0.719 | Yes | ns |
|    |             | WT ROT | 0.363   | Yes | ns |       |     |    |
|    |             | KO UNT | 0.962   | Yes | ns |       |     |    |
|    |             | KO ROT | 0.588   | Yes | ns |       |     |    |
|    | PUMA        | WT UNT | 0.942   | Yes | ns | 0.210 | Yes | ns |
|    |             | WT ROT | >0.9999 | Yes | ns |       |     |    |
|    |             | KO UNT | 0.747   | Yes | ns |       |     |    |
|    |             | KO ROT | 0.4822  | Yes | ns |       |     |    |
|    | CASP3       | WT UNT | 0.592   | Yes | ns | 0.011 | No  | *  |
|    |             | WT ROT | 0481    | Yes | ns |       |     |    |
|    |             | KO UNT | 0.662   | Yes | ns |       |     |    |
|    |             | KO ROT | >0.999  | Yes | ns |       |     |    |
|    | PINK        | WT UNT | 0.803   | Yes | ns | 0.535 | Yes | ns |
|    |             | WT ROT | 0.835   | Yes | ns |       |     |    |
|    |             | KO UNT | 0.696   | Yes | ns |       |     |    |
|    |             | KO ROT | 0.745   | Yes | ns |       |     |    |
|    | PRKN        | WT UNT | 0.752   | Yes | ns | 0.839 | Yes | ns |
|    |             | WT ROT | 0.122   | Yes | ns |       |     |    |
|    |             | KO UNT | 0.603   | Yes | ns |       |     |    |
|    |             | KO ROT | 0.985   | Yes | ns |       |     |    |
|    | TOM20       | WT UNT | 0.804   | Yes | ns | 0.251 | Yes | ns |
|    |             | WT ROT | 0.497   | Yes | ns |       |     |    |
|    |             | KO UNT | 0.921   | Yes | ns |       |     |    |
|    |             | KO ROT | 0.551   | Yes | ns |       |     |    |
| IF | TOM20/DRP1  | WT UNT | 0.477   | Yes | ns | 0.006 | No  | ** |
|    |             | WT ROT | 0.945   | Yes | ns |       |     |    |

|  |        |       |     |    |  |
|--|--------|-------|-----|----|--|
|  | KO UNT | 0.946 | Yes | ns |  |
|  | KO ROT | 0.348 | Yes | ns |  |
